# Supplementary material
Source: publisher site journal article supplement (https://www.dovepress.com/article/416202)
Supplement: Supplementary file 1 [file get_supplementary_file.php]

005

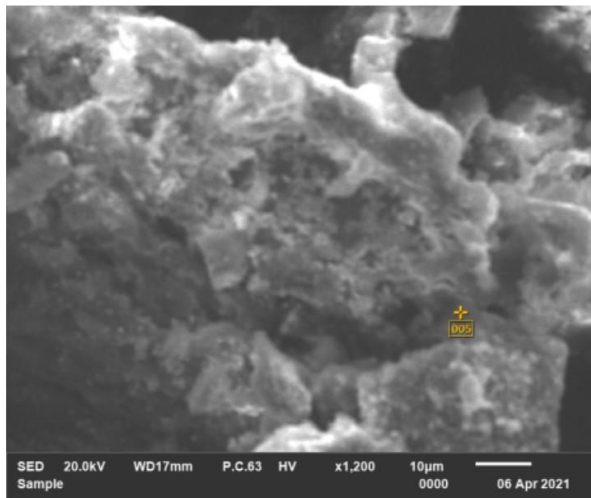

Volt : 20.00 kV  
Mag. : x 1,200  
Date : 2021/04/06  
Pixel : 640 x 480

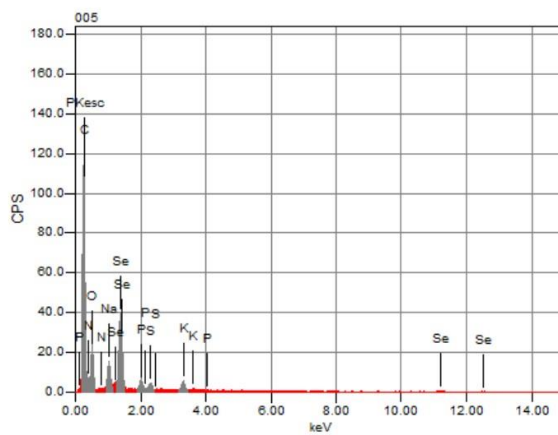

Acquisition Condition  
Instrument : IT100LA  
Volt : 20.00 kV  
Current : ---  
Process Time : T3  
Live time : 27.56 sec.  
Real Time : 27.91 sec.  
DeadTime : 2.00 %  
Count Rate : 2285.00 CPS

| Formula | mass%  | Atom%  | Sigma | Net   | K ratio   | Line |
|---------|--------|--------|-------|-------|-----------|------|
| C       | 43.28  | 52.03  | 0.03  | 74805 | 0.0205412 | K    |
| N       | 26.47  | 27.29  | 0.17  | 7796  | 0.0290421 | K    |
| O       | 19.45  | 17.56  | 0.11  | 16152 | 0.0202690 | K    |
| Na      | 1.80   | 1.13   | 0.02  | 13005 | 0.0066294 | K    |
| P       | 0.45   | 0.21   | 0.01  | 5168  | 0.0024128 | K    |
| S       | 0.33   | 0.15   | 0.01  | 4098  | 0.0018321 | K    |
| K       | 0.63   | 0.23   | 0.01  | 6688  | 0.0038747 | K    |
| Se      | 7.58   | 1.39   | 0.07  | 47746 | 0.0431695 | L    |
| Total   | 100.00 | 100.00 |       |       |           |      |

JEOL EDX System

JEOL

Figure 1 S. Scanning electron microscopy-energy dispersive X-ray analysis (SEM-EDX) of NSP.

Table 1S. Primers for gene expression by RT-PCR

| Gene         | Direction | Primer sequence          | Accession number |
|--------------|-----------|--------------------------|------------------|
| CAT          | F:        | TAAGACTGACCAGGGCA        | NM_012520.2      |
|              | R:        | CAAACCTTGGTGAGATCGAA     |                  |
| p21CIP1/WAF1 | F:        | GACCTGTTCCACACAGGAGCAAAG | NM_080782.3      |
|              | R:        | GTCTCAGTGGCGAAGTCAAAGTTC |                  |
| Bax          | F:        | GGCGAATTGGCGATGAACTG     | NM_017059.2      |
|              | R:        | ATGGTTCTGATCAGCTCGGG     |                  |
| Bcl-2        | F:        | GATTGTGGCCTTCTTTGAGT     | NM_016993.1      |
|              | R:        | ATAGTTCCACAAAGGCATCC     |                  |
| SOD          | F:        | AGGATTAAGTGAAGGCGAGCAT   | NM_017050.1      |
|              | R:        | TCTACAGTTAGCAGGCCAGCAG   |                  |
| Nrf2         | F:        | TGTCAGCTACTCCAGGTTG      | NM_031789.2      |
| GAPDH        | R:        | TCAAGAAGGTGGTGAAGCAG     | NM_017008.4      |
|              | F:        | AGGTGGAAGAATGGGAGTTG     |                  |

Bax, Bcl-2-associated X protein. Bcl-2, B-cell lymphoma 2. CAT, catalase. GAPDH, glyceraldehyde-3-phosphate dehydrogenase. SOD, superoxide dismutase. (Nrf2) Nuclear factor (erythroid-derived 2)-like 2. cyclin-dependent kinase inhibitor (CDKi) p21
